# Supplementary material
Source: PubMed Central journal article supplement (PMC4822623)
Supplement: pnas.1518046113.st01.pdf [file pnas.1518046113.st01.pdf]

**Table S1. Red deer pedigree summary statistics, obtained using the R package Pedantics [39]. ‘pairwise relatedness  $\geq \dots$ ’ gives the fraction of pairwise relationships above the indicated threshold. Individuals born before 1981 are included in these statistics, but excluded everywhere else**

|                                   |        |
|-----------------------------------|--------|
| records                           | 4134   |
| maternities                       | 3911   |
| paternities                       | 2444   |
| full sibs                         | 241    |
| maternal sibs                     | 11257  |
| maternal half sibs                | 11016  |
| paternal sibs                     | 15907  |
| paternal half sibs                | 15666  |
| maternal grandmothers             | 3517   |
| maternal grandfathers             | 2861   |
| paternal grandmothers             | 1553   |
| paternal grandfathers             | 1757   |
| maximum pedigree depth            | 9      |
| founders                          | 154    |
| mean maternal sibship size        | 4.7    |
| mean paternal sibship size        | 6.5    |
| non-zero F                        | 936    |
| F $\geq 0.125$                    | 22     |
| mean pairwise relatedness         | 0.0120 |
| pairwise relatedness $\geq 0.125$ | 0.0199 |
| pairwise relatedness $\geq 0.25$  | 0.0053 |
| pairwise relatedness $\geq 0.5$   | 0.0008 |
