# Supplementary material
Source: PubMed Central journal article supplement (PMC4822623)
Supplement: pnas.1518046113.st02.pdf [file pnas.1518046113.st02.pdf]

| Model |                        | Individuals |                  |                      |                  | Unique mothers |                  |                      |                  |
|-------|------------------------|-------------|------------------|----------------------|------------------|----------------|------------------|----------------------|------------------|
| No.   | Trait                  | Total       | $F_{\text{ped}}$ | $F_{\text{ped}} > 0$ | $F_{\text{snp}}$ | Total          | $F_{\text{ped}}$ | $F_{\text{ped}} > 0$ | $F_{\text{snp}}$ |
| M1    | Birth date             | 2483        | 1570             | 800                  | 1783             | 631            | 405              | 142                  | 484              |
| M2    | Birth weight           | 1969        | 1388             | 712                  | 1582             | 573            | 391              | 137                  | 463              |
| M3    | Summer survival        | 1918        | 1355             | 697                  | 1547             | 562            | 385              | 134                  | 457              |
| M4    | Winter survival        | 1700        | 1199             | 612                  | 1365             | 525            | 362              | 121                  | 425              |
| M5    | Age 1-2 y survival     | 1125        | 780              | 368                  | 905              | 450            | 309              | 96                   | 362              |
| M6    | Age 0-2 y survival     | 2315        | 1471             | 758                  | 1662             | 614            | 383              | 128                  | 457              |
| M7    | Female AFR             | 569         | 342              | 156                  | 392              | 326            | 197              | 56                   | 232              |
|       |                        |             |                  |                      |                  | Indiv x years  |                  |                      |                  |
| M8    | Female annual survival | 625         | 457              | 187                  | 495              | 4248           | 3394             | 1194                 | 3557             |
| M9    | Male annual survival   | 688         | 365              | 131                  | 450              | 3918           | 2045             | 537                  | 2590             |
| M10   | Female ABS             | 430         | 345              | 131                  | 365              | 2570           | 2146             | 686                  | 2226             |
| M11   | Male ABS               | 568         | 284              | 88                   | 356              | 2872           | 1498             | 338                  | 1918             |
| M12   | Female LBS             | 563         | 414              | 121                  | 436              |                |                  |                      |                  |
| M13   | Female LRS             | 507         | 370              | 107                  | 389              |                |                  |                      |                  |
| M14   | Male LBS               | 575         | 384              | 103                  | 458              |                |                  |                      |                  |
