# Supplementary material
Source: PubMed Central journal article supplement (PMC4822623)
Supplement: pnas.1518046113.st03.pdf [file pnas.1518046113.st03.pdf]

|                                         | Pedigree ( $F_{ped}$ ) |          |       |          | Genomic ( $F_{grm}$ ) |          |       |          |
|-----------------------------------------|------------------------|----------|-------|----------|-----------------------|----------|-------|----------|
| <b>M1: Birth date</b> <sup>1</sup>      | $\beta$                | SE       | Z     | P        | $\beta$               | SE       | Z     | P        |
| Intercept                               | 975                    | 138      |       | 1.77e-08 | 949                   | 121      |       | 4.85e-10 |
| Sex [male]                              | -0.04                  | 0.74     |       | 0.952    | -0.33                 | 0.68     |       | 0.631    |
| Maternal age                            | -10.2                  | 2.58     |       | 7.55e-05 | -7.16                 | 2.30     |       | 0.002    |
| Maternal age <sup>2</sup>               | 11.6                   | 2.44     |       | 2.37e-06 | 8.86                  | 2.16     |       | 4.17e-05 |
| Maternal status [Winter]                | 7.83                   | 1.31     |       | 6.82e-13 | 8.18                  | 1.24     |       | <2e-16   |
| . [Naive]                               | 2.81                   | 1.45     |       | 6.82e-13 | 3.74                  | 1.34     |       | <2e-16   |
| . [Milk]                                | 6.22                   | 0.96     |       | 6.82e-13 | 6.83                  | 0.87     |       | <2e-16   |
| Year (slope)                            | -0.45                  | 0.07     |       | 4.82e-08 | -0.44                 | 0.06     |       | 5.16e-09 |
| Population size $t - 1$                 | 0.18                   | 0.91     |       | 0.844    | 1.01                  | 0.86     |       | 0.252    |
| Inbreeding coefficient                  | -2.49                  | 13.4     |       | 0.852    | 16.3                  | 10.4     |       | 0.118    |
| Maternal Inbreeding coef.               | 15.0                   | 19.9     |       | 0.450    | 17.9                  | 14.2     |       | 0.207    |
| Random:                                 | Var                    | SE       | Z     |          | Var                   | SE       | Z     |          |
| Maternal ID                             | 17.30                  | 5.229    | 3.309 |          | 22.57                 | 5.052    | 4.467 |          |
| Birth year                              | 2.878                  | 1.926    | 1.494 |          | 2.956                 | 1.735    | 1.703 |          |
| Spatial region                          | 2.04e-05               | 8.31e-07 | 24.53 |          | 1.90e-05              | 7.29e-07 | 26.03 |          |
| Residual                                | 201.5                  | 8.215    | 24.53 |          | 187.6                 | 7.206    | 26.03 |          |
| <b>M2: Birth weight</b> <sup>2</sup>    | $\beta$                | SE       | Z     | P        | $\beta$               | SE       | Z     | P        |
| Intercept                               | 5.50                   | 0.27     |       | 2.51e-07 | 5.33                  | 0.26     |       | 4.96e-07 |
| Age (Hours)                             | 0.65                   | 0.03     |       | <2e-16   | 0.66                  | 0.02     |       | <2e-16   |
| Sex [male]                              | 0.30                   | 0.05     |       | 6.64e-10 | 0.32                  | 0.04     |       | 5.79e-13 |
| Birth date                              | 0.18                   | 0.04     |       | 7.39e-07 | 0.15                  | 0.03     |       | 4.65e-06 |
| Maternal age                            | 1.55                   | 0.17     |       | <2e-16   | 1.64                  | 0.16     |       | <2e-16   |
| Maternal age <sup>2</sup>               | -1.57                  | 0.17     |       | <2e-16   | -1.67                 | 0.15     |       | <2e-16   |
| Maternal status [Winter]                | -0.69                  | 0.09     |       | <2e-16   | -0.71                 | 0.08     |       | <2e-16   |
| . [Naive]                               | -0.50                  | 0.09     |       | <2e-16   | -0.44                 | 0.09     |       | <2e-16   |
| . [Milk]                                | -0.59                  | 0.07     |       | <2e-16   | -0.56                 | 0.06     |       | <2e-16   |
| Population size $t - 1$                 | -0.12                  | 0.08     |       | 0.143    | -0.11                 | 0.06     |       | 0.084    |
| Spring temperature                      | 0.19                   | 0.05     |       | 8.34e-04 | 0.18                  | 0.04     |       | 6.42e-05 |
| Inbreeding coefficient                  | -1.29                  | 0.86     |       | 0.137    | -2.25                 | 0.69     |       | 0.001    |
| Maternal Inbreeding coef.               | -0.58                  | 2.12     |       | 0.785    | -1.95                 | 1.46     |       | 0.184    |
| Random:                                 | Var                    | SE       | Z     |          | Var                   | SE       | Z     |          |
| Maternal ID                             | 0.577                  | 0.059    | 9.749 |          | 0.561                 | 0.054    | 10.37 |          |
| Birth year                              | 0.044                  | 0.017    | 2.534 |          | 0.024                 | 0.011    | 2.214 |          |
| Spatial region                          | 0.098                  | 0.069    | 1.417 |          | 0.107                 | 0.073    | 1.465 |          |
| Residual                                | 0.623                  | 0.028    | 22.12 |          | 0.617                 | 0.026    | 23.51 |          |
| <b>M3: Summer survival</b> <sup>3</sup> | $\beta$                | SE       | Z     | P        | $\beta$               | SE       | Z     | P        |
| Intercept                               | 1.60                   | 0.58     | 2.75  | 0.006    | 1.66                  | 0.56     | 2.98  | 0.003    |
| Sex [male]                              | -0.06                  | 0.19     | -0.30 | 0.764    | -0.10                 | 0.18     | -0.57 | 0.569    |
| Birth date                              | -0.25                  | 0.11     | -2.28 | 0.023    | -0.23                 | 0.11     | -2.20 | 0.028    |
| Birth weight                            | 0.51                   | 0.10     | 5.26  | 1.44e-07 | 0.49                  | 0.10     | 4.90  | 9.54e-07 |
| Maternal age                            | 0.80                   | 0.46     | 1.75  | 0.081    | 0.85                  | 0.43     | 1.97  | 0.048    |
| Maternal age <sup>2</sup>               | -0.82                  | 0.46     | -1.78 | 0.076    | -0.89                 | 0.43     | -2.09 | 0.037    |
| Population size $t - 1$                 | -0.18                  | 0.17     | -1.10 | 0.269    | -0.27                 | 0.16     | -1.71 | 0.087    |
| Inbreeding coefficient                  | 1.12                   | 3.11     | 0.36  | 0.719    | 0.11                  | 2.63     | 0.04  | 0.967    |
| Maternal Inbreeding coef.               | -3.47                  | 4.18     | -0.83 | 0.407    | -4.93                 | 3.21     | -1.54 | 0.125    |
| Random:                                 | Var                    | 2.5%     | 97.5% |          | Var                   | 2.5%     | 97.5% |          |
| Maternal ID                             | 0.202                  | 3.51e-15 | 0.647 |          | 0.396                 | 7.68e-13 | 0.975 |          |
| Spatial region                          | 0.076                  | 0.00e+00 | 0.464 |          | 0.044                 | 1.10e-13 | 0.306 |          |
| <b>M4: Winter survival</b> <sup>4</sup> | $\beta$                | SE       | Z     | P        | $\beta$               | SE       | Z     | P        |
| Intercept                               | 1.65                   | 0.97     | 1.70  | 0.090    | 1.76                  | 0.94     | 1.86  | 0.062    |
| Sex [male]                              | -0.82                  | 0.18     | -4.44 | 8.90e-06 | -0.78                 | 0.17     | -4.59 | 4.36e-06 |
| Birth date                              | -0.72                  | 0.14     | -5.23 | 1.68e-07 | -0.60                 | 0.12     | -5.07 | 3.97e-07 |
| Birth weight                            | 0.90                   | 0.12     | 7.36  | 1.87e-13 | 0.81                  | 0.11     | 7.41  | 1.26e-13 |
| Maternal age                            | 0.66                   | 0.64     | 1.05  | 0.295    | 0.51                  | 0.59     | 0.87  | 0.385    |
| Maternal age <sup>2</sup>               | -1.04                  | 0.61     | -1.72 | 0.085    | -0.93                 | 0.55     | -1.69 | 0.091    |
| Maternal status [Milk]                  | 0.39                   | 0.24     | 1.62  | 0.105    | 0.24                  | 0.22     | 1.11  | 0.269    |
| . [Naive]                               | 0.01                   | 0.35     | 0.04  | 0.971    | -0.20                 | 0.33     | -0.59 | 0.554    |
| . [Winter]                              | -0.46                  | 0.30     | -1.52 | 0.128    | -0.47                 | 0.29     | -1.65 | 0.100    |
| Winter rainfall                         | -1.07                  | 0.25     | -4.23 | 2.37e-05 | -0.90                 | 0.24     | -3.81 | 1.36e-04 |
| Inbreeding coefficient                  | -17.3                  | 3.55     | -4.88 | 1.09e-06 | -12.4                 | 2.53     | -4.91 | 9.20e-07 |
| Maternal Inbreeding coef.               | -4.65                  | 4.68     | -0.99 | 0.321    | -3.06                 | 3.29     | -0.93 | 0.352    |
| Random:                                 | Var                    | 2.5%     | 97.5% |          | Var                   | 2.5%     | 97.5% |          |
| Maternal ID                             | 0.600                  | 0.233    | 1.567 |          | 0.444                 | 0.107    | 1.188 |          |
| Birth year                              | 1.511                  | 1.108    | 5.296 |          | 1.426                 | 0.986    | 3.671 |          |
| Spatial region                          | 0.995                  | 0.073    | 3.272 |          | 1.176                 | 0.083    | 3.128 |          |

<sup>1</sup>Birth date (days), linear mixed model fitted with ASREML

<sup>2</sup>Capture weight (kg) of calves caught within 7 days of birth, linear mixed model fitted with ASREML

<sup>3</sup>Calf summer survival (until October 1). All survival models were fitted as binomial mixed models in LME4.

<sup>4</sup>Calf winter survival (October 1 – May 1)

Table S3: (continued)

|                                                | Pedigree ( $F_{ped}$ ) |          |          |          | Genomic ( $F_{grm}$ ) |          |          |          |
|------------------------------------------------|------------------------|----------|----------|----------|-----------------------|----------|----------|----------|
| <b>M5: Age 1–2 survival</b> <sup>5</sup>       | $\beta$                | SE       | Z        | P        | $\beta$               | SE       | Z        | P        |
| Intercept                                      | 2.95                   | 0.58     | 5.08     | 3.82e-07 | 3.42                  | 0.69     | 4.96     | 7.02e-07 |
| Sex [male]                                     | -0.73                  | 0.22     | -3.32    | 9.02e-04 | -0.93                 | 0.23     | -4.11    | 3.89e-05 |
| Birth date                                     | -0.34                  | 0.17     | -2.03    | 0.043    | -0.52                 | 0.16     | -3.25    | 0.001    |
| Birth weight                                   | 0.51                   | 0.13     | 3.84     | 1.25e-04 | 0.43                  | 0.13     | 3.29     | 0.001    |
| Maternal age                                   | -0.23                  | 0.15     | -1.54    | 0.123    | -0.33                 | 0.15     | -2.25    | 0.025    |
| Maternal status [Milk]                         | 0.10                   | 0.27     | 0.38     | 0.706    | 0.15                  | 0.27     | 0.55     | 0.579    |
| . [Naive]                                      | -2.4e-03               | 0.38     | -6.3e-03 | 0.995    | -0.25                 | 0.39     | -0.64    | 0.521    |
| . [Winter]                                     | -4.9e-04               | 0.39     | -1.3e-03 | 0.999    | -0.05                 | 0.38     | -0.12    | 0.907    |
| Inbreeding coefficient                         | -9.82                  | 4.94     | -1.99    | 0.047    | -12.3                 | 3.60     | -3.41    | 6.56e-04 |
| Maternal Inbreeding coef.                      | -5.56                  | 5.39     | -1.03    | 0.302    | -7.99                 | 4.24     | -1.88    | 0.060    |
| Random:                                        | Var                    | 2.5%     | 97.5%    |          | Var                   | 2.5%     | 97.5%    |          |
| Maternal ID                                    | 0.069                  | 3.13e-07 | 0.646    |          | 0.164                 | 3.64e-07 | 1.628    |          |
| Birth year                                     | 0.690                  | 0.158    | 1.689    |          | 0.862                 | 0.158    | 1.794    |          |
| Spatial region                                 | 0.406                  | 3.07e-05 | 0.726    |          | 1.206                 | 0.027    | 5.348    |          |
| <b>M6: Age 0–2 survival</b> <sup>6</sup>       | $\beta$                | 2.5%     | 97.5%    | P        | $\beta$               | 2.5%     | 97.5%    | P        |
| Intercept                                      | 3.64                   | 1.21     | 5.97     | 0.004    | 3.00                  | 0.51     | 5.43     | 0.023    |
| Sex [male]                                     | -0.61                  | -0.93    | -0.31    | <4e-04   | -0.67                 | -0.96    | -0.38    | <4e-04   |
| Maternal age                                   | 0.43                   | 0.11     | 0.77     | 0.010    | 0.54                  | 0.25     | 0.86     | 8.00e-04 |
| Maternal age <sup>2</sup>                      | -0.03                  | -0.05    | -0.01    | 0.002    | -0.04                 | -0.05    | -0.02    | <4e-04   |
| Maternal status [Milk]                         | -0.10                  | -0.51    | 0.28     | 0.617    | -0.28                 | -0.66    | 0.10     | 0.158    |
| . [Naive]                                      | -0.50                  | -1.10    | 0.08     | 0.098    | -0.53                 | -1.12    | 0.02     | 0.058    |
| . [Winter]                                     | -0.95                  | -1.50    | -0.43    | <4e-04   | -0.79                 | -1.32    | -0.28    | 0.002    |
| Winter rainfall                                | -3.7e-03               | -5.6e-03 | -2.1e-03 | <4e-04   | -3.5e-03              | -5.2e-03 | -1.6e-03 | 0.002    |
| Inbreeding coefficient                         | -13.4                  | -20.2    | -7.42    | <4e-04   | -13.5                 | -18.1    | -8.64    | <4e-04   |
| Maternal inbreeding coef.                      | -5.02                  | -13.6    | 3.69     | 0.261    | -8.71                 | -15.2    | -2.22    | 0.006    |
| Random:                                        | Var                    | 2.5%     | 97.5%    |          | Var                   | 2.5%     | 97.5%    |          |
| Birth year                                     | 0.531                  | 0.155    | 0.973    |          | 0.634                 | 0.251    | 1.121    |          |
| Maternal ID                                    | 0.968                  | 0.401    | 1.618    |          | 1.093                 | 0.520    | 1.729    |          |
| Spatial region                                 | 1.361                  | 0.172    | 3.371    |          | 1.893                 | 0.258    | 4.850    |          |
| <b>M7: Female AFR</b> <sup>7</sup>             | $\beta$                | 2.5%     | 97.5%    | P        | $\beta$               | 2.5%     | 97.5%    | P        |
| Intercept                                      | -0.07                  | -0.43    | 0.25     | 0.673    | -0.10                 | -0.40    | 0.20     | 0.453    |
| Birth weight                                   | -0.05                  | -0.18    | 0.06     | 0.405    | -0.08                 | -0.20    | 0.03     | 0.187    |
| Population size                                | 0.24                   | 0.06     | 0.44     | 0.010    | 0.24                  | 0.06     | 0.41     | 0.002    |
| Inbreeding coefficient                         | 1.96                   | -5.46    | 8.25     | 0.556    | 2.14                  | -1.48    | 6.36     | 0.276    |
| Maternal inbreeding coef.                      | -0.56                  | -6.29    | 4.20     | 0.857    | -3.46                 | -7.24    | 0.77     | 0.087    |
| Random:                                        | Var                    | 2.5%     | 97.5%    |          | Var                   | 2.5%     | 97.5%    |          |
| Spatial region                                 | 0.129                  | 3.64e-04 | 0.409    |          | 0.120                 | 4.48e-04 | 0.340    |          |
| <b>M8: Female annual survival</b> <sup>8</sup> | $\beta$                | 2.5%     | 97.5%    | P        | $\beta$               | 2.5%     | 97.5%    | P        |
| Intercept                                      | 7.47                   | 4.40     | 10.8     | <4e-04   | 6.85                  | 3.33     | 10.2     | <4e-04   |
| Age                                            | 0.30                   | 0.06     | 0.51     | 0.005    | 0.32                  | 0.11     | 0.53     | 0.005    |
| Age <sup>2</sup>                               | -0.03                  | -0.04    | -0.02    | <4e-04   | -0.03                 | -0.04    | -0.02    | <4e-04   |
| has/had calf in year $t$                       | -1.42                  | -1.85    | -0.97    | <4e-04   | -1.67                 | -2.15    | -1.24    | <4e-04   |
| Population size                                | -0.02                  | -0.03    | 7.4e-04  | 0.063    | -0.01                 | -0.03    | 4.7e-03  | 0.167    |
| Inbreeding coefficient                         | -2.07                  | -10.7    | 8.39     | 0.653    | -6.84                 | -13.8    | -0.43    | 0.053    |
| Random:                                        | Var                    | 2.5%     | 97.5%    |          | Var                   | 2.5%     | 97.5%    |          |
| Observation year                               | 0.211                  | 3.18e-05 | 0.559    |          | 0.293                 | 1.61e-04 | 0.637    |          |
| Birth year                                     | 0.026                  | 5.08e-05 | 0.113    |          | 0.029                 | 5.78e-05 | 0.124    |          |
| Maternal ID                                    | 0.478                  | 5.28e-05 | 1.184    |          | 0.392                 | 8.04e-05 | 1.181    |          |
| Spatial region                                 | 0.088                  | 7.24e-05 | 0.347    |          | 0.255                 | 1.31e-04 | 0.840    |          |
| <b>M9: Male annual survival</b> <sup>9</sup>   | $\beta$                | 2.5%     | 97.5%    | P        | $\beta$               | 2.5%     | 97.5%    | P        |
| Intercept                                      | 4.48                   | 3.41     | 5.77     | <4e-04   | 4.61                  | 3.50     | 5.72     | <4e-04   |
| Age                                            | 0.31                   | -0.01    | 0.62     | 0.055    | 0.32                  | 6.1e-03  | 0.60     | 0.041    |
| Age <sup>2</sup>                               | -0.05                  | -0.07    | -0.03    | <4e-04   | -0.05                 | -0.07    | -0.03    | <4e-04   |
| Immigrant                                      |                        |          |          |          | 0.03                  | -0.62    | 0.73     | 0.922    |
| Inbreeding coefficient                         | -8.41                  | -17.3    | 0.87     | 0.081    | -1.19                 | -8.44    | 6.06     | 0.739    |
| Random:                                        | Var                    | 2.5%     | 97.5%    |          | Var                   | 2.5%     | 97.5%    |          |
| Observation year                               | 0.295                  | 6.11e-05 | 0.881    |          | 0.397                 | 3.57e-04 | 0.881    |          |
| Birth year                                     | 0.427                  | 7.17e-05 | 1.068    |          | 0.521                 | 5.65e-05 | 1.138    |          |
| Maternal ID                                    | 0.199                  | 5.03e-05 | 0.936    |          | 0.239                 | 4.09e-05 | 1.054    |          |

<sup>5</sup>Yearling survival (age 1–2 years, May 1 – May 1)<sup>6</sup>Juvenile survival (age 0–2 years), binomial model with logit link fitted in MCMCglmm (model converged poorly in LME4 when birthweight was not accounted for), 600k (thousand) iterations, 100k burn-in and thinning of 200.<sup>7</sup>Female age at first reproduction, quasi-Poisson model in MCMCglmm, 40m (million) iterations, 500k burn-in and thinning of 20k. The random effect for maternal ID was estimated at 0, and dropped.<sup>8</sup>Female annual survival (age 2+), binomial model in MCMCglmm, 2m iterations, 500k burn-in and thinning of 500.<sup>9</sup>Male annual survival (age 2+). Male annual survival (age 2+), binomial model in MCMCglmm, 2m iterations, 500k burn-in and thinning of 500.  $F_{ped}$  could not be estimated for any immigrant male.

Table S3: (continued)

|                                      | Pedigree ( $F_{\text{ped}}$ ) |          |          |        | Genomic ( $F_{\text{grm}}$ ) |          |          |          |
|--------------------------------------|-------------------------------|----------|----------|--------|------------------------------|----------|----------|----------|
|                                      | $\beta$                       | 2.5%     | 97.5%    | $P$    | $\beta$                      | 2.5%     | 97.5%    | $P$      |
| <b>M10: Female ABS</b> <sup>10</sup> |                               |          |          |        |                              |          |          |          |
| Intercept                            | 4.68                          | 0.49     | 8.67     | 0.026  | 4.76                         | 0.64     | 8.65     | 0.022    |
| Age                                  | 0.79                          | 0.56     | 1.04     | <4e-04 | 0.79                         | 0.57     | 1.04     | <4e-04   |
| Age <sup>2</sup>                     | -0.04                         | -0.06    | -0.03    | <4e-04 | -0.04                        | -0.06    | -0.03    | <4e-04   |
| had calf on Oct 1 of $t - 1$         | -3.12                         | -3.46    | -2.75    | <4e-04 | -3.19                        | -3.56    | -2.82    | <4e-04   |
| Age first reprod. [early]            | 0.84                          | 0.33     | 1.39     | <4e-04 | 0.81                         | 0.28     | 1.33     | 0.002    |
| Age first reprod. [late]             | -0.85                         | -1.26    | -0.46    | <4e-04 | -0.73                        | -1.13    | -0.33    | <4e-04   |
| Population size $t - 1$              | -0.03                         | -0.05    | -3.1e-03 | 0.020  | -0.03                        | -0.05    | -5.2e-03 | 0.017    |
| Inbreeding coefficient               | -6.24                         | -14.8    | 2.21     | 0.154  | -8.35                        | -14.9    | -2.37    | 0.008    |
| Random:                              | Var                           | 2.5%     | 97.5%    |        | Var                          | 2.5%     | 97.5%    |          |
| Individual ID                        | 0.659                         | 0.195    | 1.175    |        | 0.633                        | 0.187    | 1.176    |          |
| Observation year                     | 0.714                         | 0.236    | 1.352    |        | 0.760                        | 0.272    | 1.415    |          |
| Birth year                           | 0.014                         | 4.65e-05 | 0.060    |        | 0.013                        | 5.05e-05 | 0.054    |          |
| Maternal ID                          | 0.151                         | 7.22e-05 | 0.484    |        | 0.176                        | 6.04e-05 | 0.475    |          |
| Spatial region                       | 0.218                         | 1.66e-04 | 0.680    |        | 0.173                        | 5.96e-05 | 0.518    |          |
| <b>M11: Male ABS</b> <sup>11</sup>   |                               |          |          |        |                              |          |          |          |
| Intercept                            | -10.1                         | -12.7    | -7.48    | <6e-04 | -12.5                        | -15.0    | -10.2    | <6e-04   |
| Age                                  | 2.00                          | 1.73     | 2.30     | <6e-04 | 2.25                         | 2.01     | 2.51     | <6e-04   |
| Age <sup>2</sup>                     | -0.10                         | -0.11    | -0.08    | <6e-04 | -0.11                        | -0.12    | -0.10    | <6e-04   |
| Population size $t - 1$              | -3.7e-03                      | -0.02    | 9.1e-03  | 0.552  | 2.4e-03                      | -7.5e-03 | 0.01     | 0.650    |
| Immigrant                            |                               |          |          |        | 0.72                         | 0.23     | 1.25     | 0.006    |
| Inbreeding coefficient               | -11.9                         | -27.4    | 1.19     | 0.082  | -13.0                        | -19.9    | -6.55    | <6e-04   |
| Random:                              | Var                           | 2.5%     | 97.5%    |        | Var                          | 2.5%     | 97.5%    |          |
| Individual ID                        | 1.065                         | 0.645    | 1.551    |        | 0.938                        | 0.566    | 1.337    |          |
| Observation year                     | 0.194                         | 0.088    | 0.325    |        | 0.166                        | 0.076    | 0.273    |          |
| Birth year                           | 0.302                         | 0.116    | 0.556    |        | 0.235                        | 0.093    | 0.408    |          |
| Maternal ID                          | 0.371                         | 0.140    | 0.673    |        | 0.352                        | 0.127    | 0.594    |          |
| <b>M12: Female LBS</b> <sup>12</sup> |                               |          |          |        |                              |          |          |          |
| Intercept (hurdle)                   | -6.3e-03                      | -0.68    | 0.63     | 0.986  | 0.17                         | -0.67    | 1.00     | 0.635    |
| Intercept (Poisson)                  | 1.78                          | 1.61     | 1.93     | <6e-04 | 1.64                         | 1.23     | 2.04     | <6e-04   |
| Inbreeding (hurdle)                  | 13.7                          | 1.31     | 25.2     | 0.018  | 16.8                         | 7.91     | 25.8     | <6e-04   |
| Inbreeding (Poisson)                 | -0.08                         | -3.66    | 3.65     | 0.980  | -2.12                        | -4.79    | 0.80     | 0.129    |
| Random:                              | Var                           | 2.5%     | 97.5%    |        | Var                          | 2.5%     | 97.5%    |          |
| BirthYear (hurdle)                   | 1.239                         | 0.237    | 2.577    |        | 1.256                        | 0.243    | 2.622    |          |
| BirthYear (Poisson)                  | 0.005                         | 2.14e-04 | 0.016    |        | 0.006                        | 1.89e-04 | 0.019    |          |
| Maternal ID (hurdle)                 | 0.551                         | 3.42e-04 | 1.682    |        | 0.391                        | 3.13e-04 | 1.382    |          |
| Maternal ID (Poisson)                | 0.023                         | 2.30e-04 | 0.070    |        | 0.030                        | 3.08e-04 | 0.090    |          |
| Spatial region (hurdle)              | 0.164                         | 3.26e-04 | 0.623    |        | 0.498                        | 3.11e-04 | 1.569    |          |
| Spatial region (Poisson)             | 0.024                         | 2.79e-04 | 0.085    |        | 0.224                        | 2.71e-04 | 0.783    |          |
| <b>M13: Female LRS</b> <sup>13</sup> |                               |          |          |        |                              |          |          |          |
| Intercept (hurdle)                   | 0.47                          | -0.28    | 1.25     | 0.189  | 0.68                         | -0.34    | 1.67     | 0.151    |
| Intercept (Poisson)                  | 1.22                          | 0.98     | 1.48     | <6e-04 | 0.97                         | 0.37     | 1.50     | 0.011    |
| Inbreeding (hurdle)                  | 14.2                          | 1.04     | 27.3     | 0.029  | 18.7                         | 8.41     | 30.2     | 8.08e-04 |
| Inbreeding (Poisson)                 | -9.59                         | -17.3    | -2.70    | 0.003  | -4.13                        | -8.08    | 0.13     | 0.048    |
| Random:                              | Var                           | 2.5%     | 97.5%    |        | Var                          | 2.5%     | 97.5%    |          |
| BirthYear (hurdle)                   | 0.985                         | 0.048    | 2.309    |        | 0.965                        | 0.039    | 2.240    |          |
| BirthYear (Poisson)                  | 0.028                         | 1.91e-04 | 0.087    |        | 0.015                        | 1.84e-04 | 0.053    |          |
| Maternal ID (hurdle)                 | 1.071                         | 3.36e-04 | 2.890    |        | 0.923                        | 3.86e-04 | 2.749    |          |
| Maternal ID (Poisson)                | 0.027                         | 2.40e-04 | 0.095    |        | 0.025                        | 1.97e-04 | 0.091    |          |
| Spatial region (hurdle)              | 0.302                         | 2.89e-04 | 1.215    |        | 0.956                        | 4.99e-04 | 3.157    |          |
| Spatial region (Poisson)             | 0.057                         | 2.26e-04 | 0.175    |        | 0.394                        | 0.001    | 1.377    |          |
| <b>M14: Male LBS</b> <sup>14</sup>   |                               |          |          |        |                              |          |          |          |
| Intercept (hurdle)                   | 1.61                          | 1.01     | 2.23     | <6e-04 | 2.00                         | 1.45     | 2.68     | <6e-04   |
| Intercept (Poisson)                  | 1.90                          | 1.58     | 2.18     | <6e-04 | 1.53                         | 1.25     | 1.84     | <6e-04   |
| Immigrant (hurdle)                   |                               |          |          |        | -4.11                        | -5.77    | -2.75    | <6e-04   |
| Immigrant (Poisson)                  |                               |          |          |        | 0.37                         | -0.14    | 0.89     | 0.163    |
| Inbreeding (hurdle)                  | 31.7                          | 9.89     | 54.6     | <6e-04 | 18.6                         | 7.81     | 28.3     | 0.001    |
| Inbreeding (Poisson)                 | -23.3                         | -50.2    | 0.14     | 0.057  | -14.9                        | -22.8    | -7.92    | <6e-04   |
| Random:                              | Var                           | 2.5%     | 97.5%    |        | Var                          | 2.5%     | 97.5%    |          |
| BirthYear (hurdle)                   | 1.239                         | 0.142    | 2.745    |        | 0.955                        | 0.012    | 2.091    |          |
| BirthYear (Poisson)                  | 0.129                         | 2.43e-04 | 0.404    |        | 0.027                        | 1.77e-04 | 0.111    |          |
| Maternal ID (hurdle)                 | 0.268                         | 2.40e-04 | 1.226    |        | 0.300                        | 2.87e-04 | 1.412    |          |
| Maternal ID (Poisson)                | 0.267                         | 2.87e-04 | 0.832    |        | 0.205                        | 2.58e-04 | 0.728    |          |

<sup>10</sup>Female annual breeding success (age 5+), binomial mixed model in MCMCglmm October 1 is in the autumn rut (mating season). 600,000 iterations, 100,000 burn-in and thinning of 200.

<sup>11</sup>Male ABS (age 5+), quasi-Poisson model fitted with MCMCglmm, 1m iterations, 100k burn-in and thinning of 500.

<sup>12</sup>Lifetime breeding success (females), hurdle Poisson model fitted with MCMCglmm, 10m iterations, 200k burn-in and thinning of 5k. '(hurdle)' denotes parameters affecting the probability for LBS to be zero, and '(Poisson)' those affecting the truncated Poisson distribution (LBS greater than zero).

<sup>13</sup>Lifetime reproductive success (females) (no. of surviving offspring), hurdle Poisson model fitted with MCMCglmm, 40m iterations, 500k burn-in and thinning of 2k for  $F_{\text{grm}}$ , and 2m iterations, 200k burn-in and thinning of 1k for  $F_{\text{ped}}$ .

<sup>14</sup>Lifetime breeding success (males), hurdle Poisson model fitted with MCMCglmm, 1m iterations, 100k burn-in and thinning of 500. The effect of immigrant status on the hurdle is due to observation bias, as no young males immigrated.
